# Supplementary material for: A Revised Version of Diabetes Quality of Life Instrument Maintaining Domains for Satisfaction, Impact, and Worry
Source: Hindawi journal article supplement (doi:10.1155/2018/5804687), 2018-07-22
Supplement: f1 [file 5804687.f1.pdf]

## The Revised Version of DQOL (RV-DQOL13) Questionnaire

**Please read every statement carefully and circle the number that best describe your feeling or situation.**

*Sila baca setiap pernyataan dengan teliti dan tandakan nombor yang paling sesuai untuk anda..*

### Satisfaction Domain

*Tahap kepuasan*

|   |                                                                                                                                                                                                 | Very<br>satisfied<br><i>Sangat<br/>Puas<br/>hati</i> | Moderately<br>satisfied | Neither<br>satisfied nor<br>dissatisfied | Moderately<br>dissatisfied | Very<br>dissatisfied<br><i>Sangat tidak<br/>puas hati</i> |
|---|-------------------------------------------------------------------------------------------------------------------------------------------------------------------------------------------------|------------------------------------------------------|-------------------------|------------------------------------------|----------------------------|-----------------------------------------------------------|
| 1 | How satisfied are you with the amount of time it takes to manage your diabetes?<br><i>Sejauh manakah anda berpuas hati dengan jumlah masa yang digunakan untuk menguruskan diabetes anda?</i>   | 1                                                    | 2                       | 3                                        | 4                          | 5                                                         |
| 2 | How satisfied are you with the amount of time you spend getting checkups?<br><i>Sejauh manakah anda berpuas hati dengan jumlah masa yang anda gunakan untuk mendapatkan pemeriksaan doctor?</i> | 1                                                    | 2                       | 3                                        | 4                          | 5                                                         |
| 3 | How satisfied are you with the time it takes to determine your sugar level?<br><i>Sejauh manakah anda berpuas hati dengan jumlah masa yang anda ambil untuk menentukan paras gula anda?</i>     | 1                                                    | 2                       | 3                                        | 4                          | 5                                                         |
| 4 | How satisfied are you with your current treatment<br><i>Sejauh manakah anda berpuas hati dengan rawatan anda sekarang?</i>                                                                      | 1                                                    | 2                       | 3                                        | 4                          | 5                                                         |
| 5 | How satisfied are you with your knowledge about your diabetes?<br><i>Sejauh manakah anda berpuas hati dengan pengetahuan anda tentang penyakit diabetes?</i>                                    | 1                                                    | 2                       | 3                                        | 4                          | 5                                                         |
| 6 | How satisfied are you with life in general?<br><i>Sejauh manakah anda berpuas hati dengan kehidupan anda secara keseluruhannya?</i>                                                             | 1                                                    | 2                       | 3                                        | 4                          | 5                                                         |

### Impact Domain

*Kesan penyakit diabetes*

|   |                                                                                                                                                                                                           | Never<br><i>Tidak<br/>pernah<br/>langsung</i> | Sometimes<br><i>Sekali sekala</i> | Often<br><i>Kadang-kadang</i> | Frequently<br><i>Kerap</i> | Always<br><i>Sepanjang<br/>masa</i> |
|---|-----------------------------------------------------------------------------------------------------------------------------------------------------------------------------------------------------------|-----------------------------------------------|-----------------------------------|-------------------------------|----------------------------|-------------------------------------|
| 1 | How often do you feel pain associated with the treatment for your diabetes?<br><i>Berapa kerapkah anda mengalami rasa sakit yang ada kaitannya dengan rawatan diabetes anda?</i>                          | 1                                             | 2                                 | 3                             | 4                          | 5                                   |
| 2 | How often do you feel physically ill?<br><i>Berapa kerapkah anda berasa sakit dari segi fizikal?</i>                                                                                                      | 1                                             | 2                                 | 3                             | 4                          | 5                                   |
| 3 | How often does your diabetes interfere with your family life?<br><i>Berapa kerapkah diabetes mengganggu kehidupan keluarga anda?</i>                                                                      | 1                                             | 2                                 | 3                             | 4                          | 5                                   |
| 4 | How often do you find your diabetes limiting your social relationships and friendships?<br><i>Berapa kerapkah anda mendapati penyakit diabetes anda menghadkan hubungan social dan persahabatan anda?</i> | 1                                             | 2                                 | 3                             | 4                          | 5                                   |

**Worry Domain***Kebimbangan Sosial & kebingangan Diabetes*

|                                                                                                                                                                                        | <b>Never</b><br><i>Tidak pernah langsung</i> | <b>Sometimes</b><br><i>Sekali sekala</i> | <b>Often</b><br><i>Kadang-kadang</i> | <b>Frequently</b><br><i>Kerap</i> | <b>Always</b><br><i>Sepanjang masa</i> |
|----------------------------------------------------------------------------------------------------------------------------------------------------------------------------------------|----------------------------------------------|------------------------------------------|--------------------------------------|-----------------------------------|----------------------------------------|
| 1 How often do you worry about whether you will pass out?<br><i>Berapa kerapkah anda bimbang yang anda akan pengsan?</i>                                                               | 1                                            | 2                                        | 3                                    | 4                                 | 5                                      |
| 2 How often do you worry that your body looks different because you have diabetes?<br><i>Berapa kerapkah anda bimbang yang tubuh badan anda nampak lain kerana menghidap diabetes?</i> | 1                                            | 2                                        | 3                                    | 4                                 | 5                                      |
| 3 How often do your worry that you will get complications from your diabetes?<br><i>Berapa kerapkah anda bimbang sama ada anda akan mendapat komplikasi akibat diabetes anda?</i>      | 1                                            | 2                                        | 3                                    | 4                                 | 5                                      |

Table 1: The proposed scoring of each domain and total score for a revised DQoL

| <b>Domains</b>   | <b>No. of items</b> | <b>Range of score for each item</b> | <b>Range of score</b> | <b>Converted to percentage</b> |
|------------------|---------------------|-------------------------------------|-----------------------|--------------------------------|
| Satisfaction (S) | 6                   | 1 to 5                              | 6 – 30                | (S) / 30 x 100                 |
| Impact (I)       | 4                   |                                     | 4 – 20                | (I) / 20 x 100                 |
| Worry (W)        | 3                   |                                     | 3 – 15                | (W) / 15 x 100                 |
| Total            | 13                  |                                     | 13 – 65               | Total / 65 x 100               |

*Higher score indicates poorer quality of life.*
